# Supplementary material for: Production and purification of mannan oligosaccharide with epithelial tight junction enhancing activity
Source: PeerJ. 2019 Jul 2;7:e7206. doi: 10.7717/peerj.7206 (PMC6611449; doi:10.7717/peerj.7206)
Supplement: Supplemental Information 1 [file peerj-07-7206-s006.xlsx]

## Sheet: raw data fig5a
Percent TEER changed
MOS4	MOS5	MOS6	MOS7	Vehicle	average vehicle
168.5	215.61	149.18	146.87	151.93	155.607
178.39	208.08	143.59	134.21	160.47
177.94	225.05	140.38	145.64	154.42
167.81	214.45	162.97	129.04
relative percent changed
MOS4	MOS5	MOS6	MOS7	DMEM
108.286	138.561	95.8699	94.3854	97.6372
114.642	133.722	92.2775	86.2495	103.125
114.352	144.627	90.2146	93.595	99.2374
107.842	137.815	104.732	82.927

## Sheet: Raw data fig5b
Relative TEER changed (ever 0 minute)
minute			MOS5					Vehicle (DMEM)
	n1	n2	n3	n4	n5	n1	n2	n3	n4
before	201.07	207.85	250.73	213.33	179.86	330.3	323.13	230.02	278.47
0	100	100	100	100	100	100	100	100	100
15	117.38	116.92	119.96	122.94	107.68	107.23	119.27	117.21	109.26
30	133.38	134.62	129.94	132.75	131.45	117.48	122.06	124.28	109.72
45	140.24	139.23	132.02	135.49	135.51	121.21	125.91	130.4	117.59
60	145.58	141.54	135.97	139.41	139.86	121.21	126.34	131.93	117.36
75	148.93	146.46	139.71	143.53	146.09	125.17	129.76	139.58	125
90	155.95	156.31	143.45	149.22	149.28	130.77	134.05	143.21	127.31
105	160.21	160.15	147.19	150	155.51	131.7	134.69	151.82	130.09
120	166.92	164.62	149.27	153.73	157.25	134.73	141.97	153.92	134.26
150	167.84	168.77	151.98	155.29	157.97	137.06	143.47	154.68	135.42
180	176.52	176.62	160.91	161.96	162.61	143.59	149.89	160.8	145.6
360	205.49	200.62	192.1	186.67	192.03	172.96	178.16	182.98	164.35
720	228.05	225.23	224.53	212.75	218.26	198.93	207.71	208.41	191.67
